# Supplementary material for: Ensemble-based enzyme design can recapitulate the effects of laboratory directed evolution in silico
Source: PubMed Central journal article supplement (PMC7511930; doi:10.1038/s41467-020-18619-x), 2020-09-23
Supplement: 41467_2020_18619_MOESM3_ESM.pdf [file 41467_2020_18619_MOESM3_ESM.pdf]

## **Description of Additional Supplementary Files**

File Name: Supplementary Software

Description: This file contains the Triad scripts used within this study, as well as the attribute file specifying force field parameters for the transition state.
